# Supplementary material for: Tumor and Cerebrospinal Fluid microRNAs in Primary Central Nervous System Lymphomas
Source: MDPI journal article supplement (doi:10.3390/cancers11111647), 2019-10-25
Supplement: s1 [file s1]

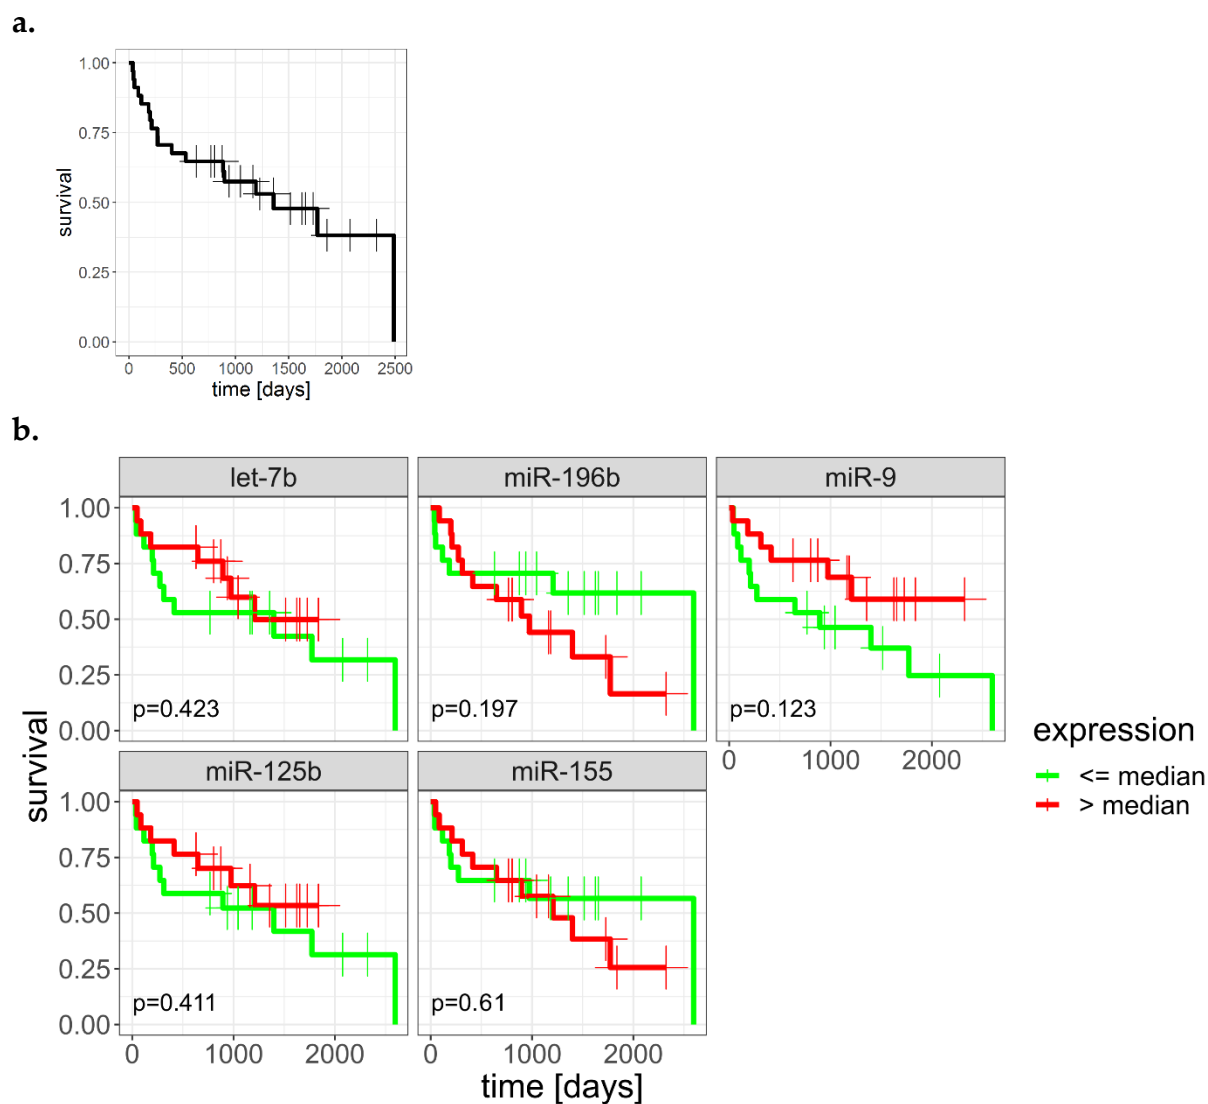

Figure S3. Overall survival (OS) analyses of patients with CNS DLBCL (patients no 1-34 in Table S3). Cox proportional hazards model was applied. A separate model was created for each variable OS was calculated from the date of diagnosis to the date of death, or – for patients who were still alive – to the date of the last observation. **a.** OS of all 34 patients; **b.** OS depending on tumor microRNA expression levels.
