# Supplementary material for: Tumor and Cerebrospinal Fluid microRNAs in Primary Central Nervous System Lymphomas
Source: MDPI journal article supplement (doi:10.3390/cancers11111647), 2019-10-25
Supplement: s1 [file s1]

**Table S7.** Antibodies used for flow cytometry.

| Source           | Clone          | MoAb          |
|------------------|----------------|---------------|
|                  | 2D1            | <b>CD45</b>   |
| Becton Dickinson | L243           | <b>HLA-DR</b> |
|                  | 4G7            | <b>CD19</b>   |
|                  | L27            | <b>CD20</b>   |
|                  | SK7            | <b>CD3</b>    |
|                  | SK3            | <b>CD4</b>    |
|                  | L17F12         | <b>CD5</b>    |
|                  | SK1            | <b>CD8</b>    |
|                  | HI10a          | <b>CD10</b>   |
|                  | S-HCL-3        | <b>CD11c</b>  |
|                  | L01.1          | <b>CD71</b>   |
|                  | TB28-2/1-155-2 | <b>κ/λ</b>    |
| Serotec          | DFT-1          | <b>CD43</b>   |

MoAb, monoclonal antibodies; κ/λ (kappa/lambda)
