# Supplementary material for: Tumor and Cerebrospinal Fluid microRNAs in Primary Central Nervous System Lymphomas
Source: MDPI journal article supplement (doi:10.3390/cancers11111647), 2019-10-25
Supplement: s1 [file s1]

**Table S4.** Non-neoplastic cerebral or cerebellum tumor patients (n=42): pathomorphological diagnosis and tumor miRNA expression levels.

| pt. ID no. | age/sex | HP, non-neoplastic cerebral hemispheres (1) or cerebellum (2) tumors | miRNA extracted from FFPET |          |          |         |        |
|------------|---------|----------------------------------------------------------------------|----------------------------|----------|----------|---------|--------|
|            |         |                                                                      | let-7b                     | miR-125b | miR-196b | miR-155 | miR-9  |
| 53         | 33/m    | reaction process, gliosis (1)                                        | 4.72                       | 11.33    | 0.0003   | 0.007   | 6.50   |
| 54         | 25/m    | cavernous malformation, gliosis (1)                                  | 13.70                      | 47.72    | 0.0170   | 0.068   | 0.89   |
| 55         | 59/m    | reaction process, gliosis (1)                                        | 4.84                       | 8.54     | 0.0003   | 0.011   | 3.07   |
| 56         | 68/m    | cerebral hemispheres tissue (1)                                      | 17.55                      | 15.79    | 0.0197   | 0.032   | 1.03   |
| 57         | 26/m    | reaction process, gliosis (1)                                        | 4.84                       | 8.47     | 0.0023   | 0.035   | 1.15   |
| 58         | 63/m    | reaction process, gliosis (2)                                        | 24.82                      | 13.10    | 0.0009   | 0.007   | 5.47   |
| 59         | 64/m    | cavernous malformation (2)                                           | 10.299                     | 5.738    | 0.0029   | 0.020   | 6.066  |
| 60         | 28/f    | cyst (2)                                                             | 9.778                      | 5.145    | 0.0004   | 0.004   | 7.151  |
| 61         | 32/m    | abscess, reaction process (1)                                        | 10.610                     | 6.699    | 0.0005   | 0.039   | 1.201  |
| 62         | 43/f    | cavernous malformation, gliosis (1)                                  | 6.248                      | 3.951    | 0.0022   | 0.038   | 0.502  |
| 63         | 47/f    | cavernous malformation, gliosis (1)                                  | 4.459                      | 2.531    | 0.0046   | 0.064   | 0.371  |
| 64         | 41/f    | hematoma, reaction process (1)                                       | 1.588                      | 1.248    | 0.0016   | 0.132   | 0.840  |
| 65         | 34/f    | cavernous malformation, gliosis (1)                                  | 7.476                      | 4.971    | 0.0001   | 0.014   | 0.831  |
| 66         | 52/m    | gliosis (1)                                                          | 14.495                     | 17.187   | 0.0008   | 0.035   | 2.097  |
| 67         | 76/m    | hematoma (1)                                                         | 23.862                     | 29.304   | 0.0025   | 0.011   | 5.822  |
| 68         | 40/m    | gliosis (1)                                                          | 7.873                      | 11.065   | 0.0001   | 0.030   | 3.608  |
| 69         | 50/m    | ischemic necrosis, gliosis (1)                                       | 5.621                      | 11.273   | 0.0002   | 0.078   | 0.648  |
| 70         | 51/m    | cavernous malformation, gliosis (1)                                  | 3.185                      | 0.594    | 0.0357   | 0.041   | 0.011  |
| 71         | 47/m    | hematoma (1)                                                         | 3.724                      | 3.878    | 0.001    | 0.125   | 0.090  |
| 72         | 78/f    | cerebral hemisphere tissue (1)                                       | 9.959                      | 18.410   | 0.0005   | 0.039   | 5.500  |
| 73         | 65/m    | reaction process (1)                                                 | 3.874                      | 5.783    | 0.0003   | 0.382   | 3.297  |
| 74         | 18/f    | cerebellum tissue (2)                                                | 31.430                     | 42.907   | 0.0008   | 0.015   | 12.135 |
| 75         | 69/f    | reaction process, lymphocytic inflatation (1)                        | 27.868                     | 5.652    | 0.100    | 0.615   | 4.079  |

|    |      |                                                                       |       |       |        |       |       |
|----|------|-----------------------------------------------------------------------|-------|-------|--------|-------|-------|
| 76 | 58/f | reaction process (1)                                                  | 5.84  | 10.76 | 0.0007 | 0.007 | 11.64 |
| 77 | 73/m | cavernous malformation, gliosis (1)                                   | 4.23  | 10.42 | 0.0009 | 0.008 | 11.52 |
| 78 | 62/m | hematoma (1)                                                          | 5.06  | 9.47  | 0.0008 | 0.008 | 11.33 |
| 79 | 56/f | reaction process, toxoplasmosis?<br>gliosis (1)                       | 3.46  | 2.62  | 0.0018 | 0.072 | 2.09  |
| 80 | 30/f | ischemic necrosis, gliosis (1)                                        | 5.88  | 11.48 | 0.0006 | 0.018 | 10.62 |
| 81 | 54/f | hematoma (1)                                                          | 6.12  | 13.96 | 0.0007 | 0.013 | 10.08 |
| 82 | 35/f | reaction process, gliosis (1)                                         | 7.55  | 17.22 | 0.0003 | 0.004 | 24.02 |
| 83 | 34/m | focal cortical dysplasia (FCD) type IIA<br>(1), ischemic necrosis (1) | 6.54  | 10.50 | 0.0002 | 0.008 | 9.88  |
| 84 | 57/m | gliosis (1), brain tissue (1)                                         | 5.88  | 11.45 | 0.0006 | 0.008 | 10.83 |
| 85 | 67/f | cerebral hemispheres tissue (1)                                       | 14.09 | 9.44  | 0.0011 | 0.004 | 3.25  |
| 86 | 65/f | hematoma, gliosis (1)                                                 | 10.53 | 1.75  | 0.17   | 0.002 | 0.02  |
| 87 | 27/m | cavernous malformation, gliosis (1)                                   | 6.46  | 6.90  | 0.0021 | 0.042 | 2.62  |
| 88 | 28/f | focal cortical dysplasia (FCD) type IIB<br>(1)                        | 5.81  | 10.56 | 0.0015 | 0.008 | 8.45  |
| 89 | 34/f | cerebellum tissue (2)                                                 | 7.30  | 7.32  | 0.0007 | 0.005 | 11.63 |
| 90 | 31/m | reaction process (1)                                                  | 5.71  | 14.41 | 0.0019 | 0.011 | 12.17 |
| 91 | 32/f | ischemic necrosis (1)                                                 | 4.34  | 9.68  | 0.0002 | 0.005 | 14.43 |
| 92 | 42/m | cerebral hemispheres tissue (1)                                       | 4.37  | 7.99  | 0.0006 | 0.005 | 9.57  |
| 93 | 36/m | hematoma (1)                                                          | 6.45  | 6.57  | 0.0010 | 0.006 | 7.75  |
| 94 | 54/m | cerebral hemispheres tissue (1)                                       | 5.28  | 5.94  | 0.0017 | 0.001 | 4.03  |

age/sex, m-male, f-female; HP. histopathological diagnosis from non-neoplastic CNS tumor; tumor miRNA expression levels (RNA extracted from formalin fixed paraffin embedded tissue).
