# Supplementary material for: Tumor and Cerebrospinal Fluid microRNAs in Primary Central Nervous System Lymphomas
Source: MDPI journal article supplement (doi:10.3390/cancers11111647), 2019-10-25
Supplement: s1 [file s1]

**Table S3.** Clinical and pathomorphological characteristics of CNS DLBCL patients (n=52), along with miRNA expression levels in tumor biopsy samples.

| pt. ID no.* | age/sex | Histo-pathology | IHC                            |                     | miRNA extracted from FFPE |          |          |         |       | Prognostic Score System for Primary CNS Lymphomas |                                           | Treatment |     |      | Response Status/Last FU (mo) |
|-------------|---------|-----------------|--------------------------------|---------------------|---------------------------|----------|----------|---------|-------|---------------------------------------------------|-------------------------------------------|-----------|-----|------|------------------------------|
|             |         |                 | cell of origin: GCB ABC CD5(+) | BCL2: (++)h (+) (-) | let-7b                    | miR-125b | miR-196b | miR-155 | miR-9 | IELSG: 0-1=0 2-3=1 4-5=2                          | MSKCC: 1=<50y 2=>50y >70KFS 3=>50y <70KFS | HD-MTX    | RTH | ASCT | ANED or DOD                  |
| 1           | 45/f    | CNS DLBCL       | GCB                            | (++)h               | 1.94                      | 1.43     | 0.01     | 1.71    | 0.45  | 1                                                 | 1                                         | yes       | no  | no   | DOD (4)                      |
| 2           | 82/m    | CNS DLBCL       | ABC                            | (++)h               | 0.72                      | 3.28     | 0.04     | 3.48    | 3.21  | 2                                                 | 3                                         | no        | yes | no   | ANED (39)                    |
| 3           | 59/m    | CNS DLBCL       | ABC                            | (+)                 | 5.54                      | 1.34     | 0.01     | 2.05    | 0.34  | 1                                                 | 2                                         | yes       | no  | yes  | ANED (31)                    |
| 4           | 40/f    | CNS DLBCL       | CD5(+)                         | (-)                 | 2.63                      | 3.01     | 0.09     | 5.38    | 0.40  | 2                                                 | 1                                         | yes       | no  | no   | DOD (3)                      |
| 5           | 55/m    | CNS DLBCL       | ABC                            | (++)h               | 4.18                      | 4.32     | 0.001    | 1.077   | 2.421 | 1                                                 | 2                                         | yes       | no  | yes  | DOD (6)                      |
| 6           | 63/f    | CNS DLBCL       | ABC                            | (++)h               | 1.05                      | 2.38     | 0.003    | 1.243   | 1.265 | 1                                                 | 2                                         | yes       | yes | no   | ANED (45)                    |
| 7           | 66/f    | CNS DLBCL       | CD5(+)                         | (++)h               | 3.13                      | 4.23     | 0.001    | 1.007   | 0.071 | 1                                                 | 2                                         | yes       | no  | no   | ANED (50)                    |
| 8           | 36/m    | CNS DLBCL       | GCB                            | (++)h               | 1.40                      | 0.63     | 0.045    | 3.007   | 0.248 | 2                                                 | 1                                         | yes       | yes | no   | DOD (6)                      |
| 9           | 47/m    | CNS DLBCL       | GCB                            | (++)h               | 4.17                      | 1.74     | 0.005    | 15.103  | 0.154 | 1                                                 | 1                                         | yes       | no  | yes  | ANED (34)                    |
| 10          | 54/m    | CNS DLBCL       | ABC                            | (+)                 | 2.30                      | 1.14     | 0.088    | 10.406  | 0.620 | 2                                                 | 3                                         | yes       | yes | no   | DOD (10)                     |
| 11          | 54/f    | CNS DLBCL       | ABC                            | (+)                 | 6.52                      | 4.21     | 0.005    | 19.136  | 3.107 | 1                                                 | 2                                         | yes       | yes | no   | ANED (60)                    |
| 12          | 66/f    | CNS DLBCL       | CD5(+)                         | (++)h               | 0.44                      | 0.28     | 0.012    | 1.943   | 0.093 | 2                                                 | 3                                         | yes       | yes | no   | DOD (86)                     |
| 13          | 50/m    | CNS DLBCL       | CD5(+)                         | (+)                 | 1.59                      | 1.74     | 0.051    | 0.510   | 0.959 | 1                                                 | 1                                         | yes       | no  | no   | ANED (39)                    |
| 14          | 70/f    | CNS DLBCL       | ABC                            | (+)                 | 1.98                      | 0.44     | 0.158    | 53.291  | 0.305 | 2                                                 | 3                                         | yes       | yes | no   | DOD (7)                      |
| 15          | 73/f    | CNS DLBCL       | ABC                            | (+)                 | 3.20                      | 2.05     | 0.002    | 22.246  | 0.557 | 2                                                 | 3                                         | yes       | no  | no   | DOD (2)                      |

|    |      |           |        |       |      |       |        |        |       |   |   |     |     |     |           |
|----|------|-----------|--------|-------|------|-------|--------|--------|-------|---|---|-----|-----|-----|-----------|
| 16 | 50/m | CNS DLBCL | CD5(+) | (+)   | 3.57 | 0.07  | 5.735  | 25.700 | 0.364 | 1 | 1 | yes | no  | no  | DOD (29)  |
| 17 | 62/f | CNS DLBCL | CD5(+) | (+)   | 0.57 | 0.47  | 0.042  | 3.110  | 0.387 | 1 | 2 | yes | no  | no  | DOD (46)  |
| 18 | 57/f | CNS DLBCL | ABC    | (+)   | 1.22 | 1.13  | 0.046  | 3.997  | 0.435 | 0 | 3 | yes | yes | no  | DOD (59)  |
| 19 | 51/f | CNS DLBCL | ABC    | (+)   | 0.89 | 0.65  | 0.129  | 11.874 | 1.341 | 1 | 2 | yes | yes | no  | ANED (76) |
| 20 | 62/m | CNS DLBCL | ABC    | (+)   | 1.59 | 1.57  | 0.020  | 2.619  | 0.090 | 2 | 3 | no  | no  | no  | DOD (1)   |
| 21 | 59/f | CNS DLBCL | ABC    | (+)   | 3.83 | 7.97  | 0.083  | 5.224  | 2.962 | 1 | 2 | yes | yes | no  | ANED (57) |
| 22 | 65/f | CNS DLBCL | ABC    | (+)   | 3.19 | 2.20  | 0.051  | 3.395  | 0.011 | 2 | 2 | no  | yes | no  | DOD (22)  |
| 23 | 67/m | CNS DLBCL | ABC    | (+)   | 6.23 | 5.89  | 0.005  | 0.534  | 3.861 | 2 | 2 | yes | yes | no  | ANED (21) |
| 24 | 63/f | CNS DLBCL | CD5(+) | (+)   | 7.05 | 4.58  | 0.015  | 1.168  | 0.832 | 1 | 2 | yes | yes | no  | ANED (54) |
| 25 | 42/m | CNS DLBCL | ABC    | (+)   | 7.19 | 11.71 | 0.003  | 0.034  | 5.752 | 1 | 1 | yes | no  | yes | ANED (54) |
| 26 | 49/f | CNS DLBCL | ABC    | (+)   | 1.29 | 1.32  | 0.007  | 1.01   | 0.41  | 1 | 1 | yes | yes | no  | ANED (68) |
| 27 | 65/m | CNS DLBCL | ABC    | (++)h | 1.59 | 0.83  | 0.002  | 1.80   | 0.79  | 2 | 3 | no  | no  | no  | DOD (2)   |
| 28 | 49/f | CNS DLBCL | ABC    | (++)h | 3.40 | 3.75  | 0.017  | 4.80   | 2.41  | 2 | 1 | yes | no  | no  | DOD (40)  |
| 29 | 66/f | CNS DLBCL | ABC    | (+)   | 2.53 | 3.99  | 0.0005 | 0.50   | 2.81  | 2 | 2 | yes | yes | no  | ANED (29) |
| 30 | 74/f | CNS DLBCL | ABC    | (++)h | 2.80 | 3.70  | 0.057  | 0.66   | 2.21  | 1 | 2 | yes | yes | no  | DOD (32)  |
| 31 | 59/m | CNS DLBCL | ABC    | (+)   | 2.07 | 0.34  | 0.079  | 26.04  | 0.21  | 1 | 2 | yes | no  | yes | ANED (25) |
| 32 | 68/f | CNS DLBCL | ABC    | (++)h | 2.57 | 3.65  | 0.082  | 5.43   | 2.43  | 2 | 2 | yes | yes | no  | ANED (26) |
| 33 | 31/f | CNS DLBCL | GCB    | (+)   | 1.23 | 0.85  | 0.097  | 1.08   | 0.26  | 1 | 1 | yes | yes | no  | DOD (10)  |
| 34 | 64/m | CNS DLBCL | ABC    | (+)   | 1.57 | 2.47  | 0.189  | 6.49   | 2.29  | 1 | 3 | yes | yes | no  | DOD (14)  |
| 35 | 81/f | CNS DLBCL | ABC    | (++)h | 1.92 | 1.53  | 0.06   | 2.43   | 0.86  |   |   |     |     |     |           |
| 36 | 77/f | CNS DLBCL | CD5(+) | (++)h | 1.35 | 0.52  | 0.46   | 13.12  | 0.06  |   |   |     |     |     |           |
| 37 | 59/m | CNS DLBCL | ABC    | (+)   | 2.53 | 1.61  | 0.241  | 5.938  | 0.444 |   |   |     |     |     |           |
| 38 | 52/m | CNS DLBCL | ABC    | (+)   | 1.57 | 0.86  | 0.101  | 23.720 | 0.446 |   |   |     |     |     |           |

|    |      |           |        |       |       |       |        |        |       |
|----|------|-----------|--------|-------|-------|-------|--------|--------|-------|
| 39 | 62/f | CNS DLBCL | CD5(+) | (+)   | 7.88  | 6.37  | 0.128  | 18.993 | 1.062 |
| 40 | 68/f | CNS DLBCL | ABC    | (+)   | 2.22  | 1.24  | 0.011  | 2.512  | 0.130 |
| 41 | 67/f | CNS DLBCL | ABC    | (+)   | 20.45 | 19.70 | 0.012  | 0.555  | 1.724 |
| 42 | 67/m | CNS DLBCL | GCB    | (+)   | 3.37  | 0.53  | 0.086  | 0.529  | 0.253 |
| 43 | 73/f | CNS DLBCL | CD5(+) | (++)h | 0.75  | 0.79  | 0.000  | 4.661  | 0.011 |
| 44 | 66/m | CNS DLBCL | CD5(+) | (++)h | 3.09  | 3.04  | 0.001  | 8.365  | 1.353 |
| 45 | 55/f | CNS DLBCL | ABC    | (+)   | 1.62  | 1.37  | 0.029  | 0.0472 | 0.001 |
| 46 | 79/f | CNS DLBCL | ABC    | (+)   | 3.93  | 3.44  | 0.001  | 5.13   | 1.51  |
| 47 | 58/f | CNS DLBCL | ABC    | (+)   | 1.18  | 1.02  | 0.047  | 2.54   | 0.34  |
| 48 | 40/f | CNS DLBCL | ABC    | (++)h | 1.38  | 1.30  | 0.0031 | 3.31   | 1.42  |
| 49 | 69/f | CNS DLBCL | CD5(+) | (++)h | 3.99  | 5.46  | 0.142  | 5.92   | 1.85  |
| 50 | 50/m | CNS DLBCL | ABC    | (++)h | 2.53  | 1.07  | 0.183  | 6.42   | 0.72  |
| 51 | 52/f | CNS DLBCL | ABC    | (+)   | 2.65  | 3.14  | 0.002  | 6.12   | 1.92  |
| 52 | 67/m | CNS DLBCL | ABC    | (+)   | 2.06  | 1.46  | 0.174  | 1.76   | 1.04  |

\*patients no. 1-34 with clinical data, patients no. 35-52 without clinical data.

age/sex., m-male, f-female; Histopathology, primary histopathological diagnosis from CNS tumor, IHC., immunohistochemical examination, cell of origin: GCB - germinal center B-cell type, ABC - activated B-cell type (non-GCB), CD5(+) CD5 – positive immunohistochemical subgroup; BCL2., BCL2 staining: (++)h, higher BCL2 staining compared to T lymphocytes, (+) BCL2 staining similar or weaker compared to T lymphocytes, (-) lack of BCL2 staining on neoplastic cells; miRNA level expression extracted from FFPET (formalin fixed paraffin embedded tissue);

Prognostic Scoring System for Primary CNS Lymphomas:

1) IELSG (the International Extranodal Lymphoma Study Group)

prognostic score is based on age over 60 years, performance status (PS) more than 1, elevated lactate dehydrogenase (LDH) serum level, high CSF protein concentration, and involvement of deep regions of the brain. These five variables are used to design a prognostic score (0-5). Each variable was assigned a value of either 0, if favorable, or 1, if unfavorable. 2) MSKCC (the Memorial Sloan-Kettering Cancer Center Prognostic Model) identified three distinct prognostic classes: class 1 (patients <50 years), class 2 (patients > or =50; Karnofsky performance score [KPS] > or =70) and class 3 (patients > or =50; KPS <70). These three classes significantly distinguished outcome with regard to both overall and failure-free survival; Treatment.: HD-MTX, high-dose metotrexate, RTH, radiotherapy, ASCT, autologous stem cell transplantation; Response Status: ANED, Alive, no evidence of disease; DOD, Died of Disease progression / Last FU (follow up) (mo).
