# Supplementary material for: Tumor and Cerebrospinal Fluid microRNAs in Primary Central Nervous System Lymphomas
Source: MDPI journal article supplement (doi:10.3390/cancers11111647), 2019-10-25
Supplement: s1 [file s1]

**Table S8.** MicroRNA sequences with GC content.

| miRBase ID    | TaqMan ID | Sequence                 | Length (nt) | GC (nt) | GC (%) |
|---------------|-----------|--------------------------|-------------|---------|--------|
| miR-9-5p      | ID 000583 | UCUUUGGUUAUCUAGCUGUAUGA  | 23          | 8       | 34,78  |
| miR-9-3p*     | ID 002231 | AUAAAGCUAGAUACCGAAAGU    | 22          | 7       | 31,82  |
| miR-let-7b-5p | ID 000378 | UGAGGUAGUAGGUUGUGUGGUU   | 22          | 10      | 45,46  |
| miR-15b-5p    | ID 000390 | UAGCAGCACAUCAUGGUUUACA   | 22          | 9       | 40,91  |
| miR-19b-3p    | ID 000396 | UGUGCAAAUCCAUGCAAAACUGA  | 23          | 9       | 39,13  |
| miR-20b-5p    | ID001014  | CAAAGUGCUCAUAGUGCAGGUAG  | 23          | 11      | 47,83  |
| miR-21-5p     | ID 000397 | UAGCUUAUCAGACUGAUGUUGA   | 22          | 8       | 36,36  |
| miR-29a-5p    | ID 002447 | ACUGAUUUCUUUUGGUGUUCAG   | 22          | 8       | 36,36  |
| miR-29b-1-5p  | ID 002165 | GCUGGUUUCAUAUGGUGGUUUAGA | 24          | 10      | 41,67  |
| miR-29b-2-5p  | ID 002166 | CUGGUUUACAUGGUGGCUUAG    | 22          | 11      | 50     |
| miR-92a-3p    | ID 000431 | UAUUGCACUUGUCCCGGCCUGU   | 22          | 12      | 54,55  |
| miR-125b-5p   | ID 000449 | UCCUGAGACCCUAACUUGUGA    | 22          | 11      | 50     |
| miR-155-5p    | ID 000479 | UUAAUGCUAUUCGUGAUAGGGG   | 22          | 9       | 40,91  |
| miR-196b-5p   | ID 002215 | UAGGUAGUUUCCUGUUGUUGGG   | 22          | 10      | 45,46  |
| miR-24-3p     | ID 000402 | UGGCUCAGUUCAGCAGGAACAG   | 22          | 12      | 54,55  |
