# Supplementary material for: Tumor and Cerebrospinal Fluid microRNAs in Primary Central Nervous System Lymphomas
Source: MDPI journal article supplement (doi:10.3390/cancers11111647), 2019-10-25
Supplement: s1 [file s1]

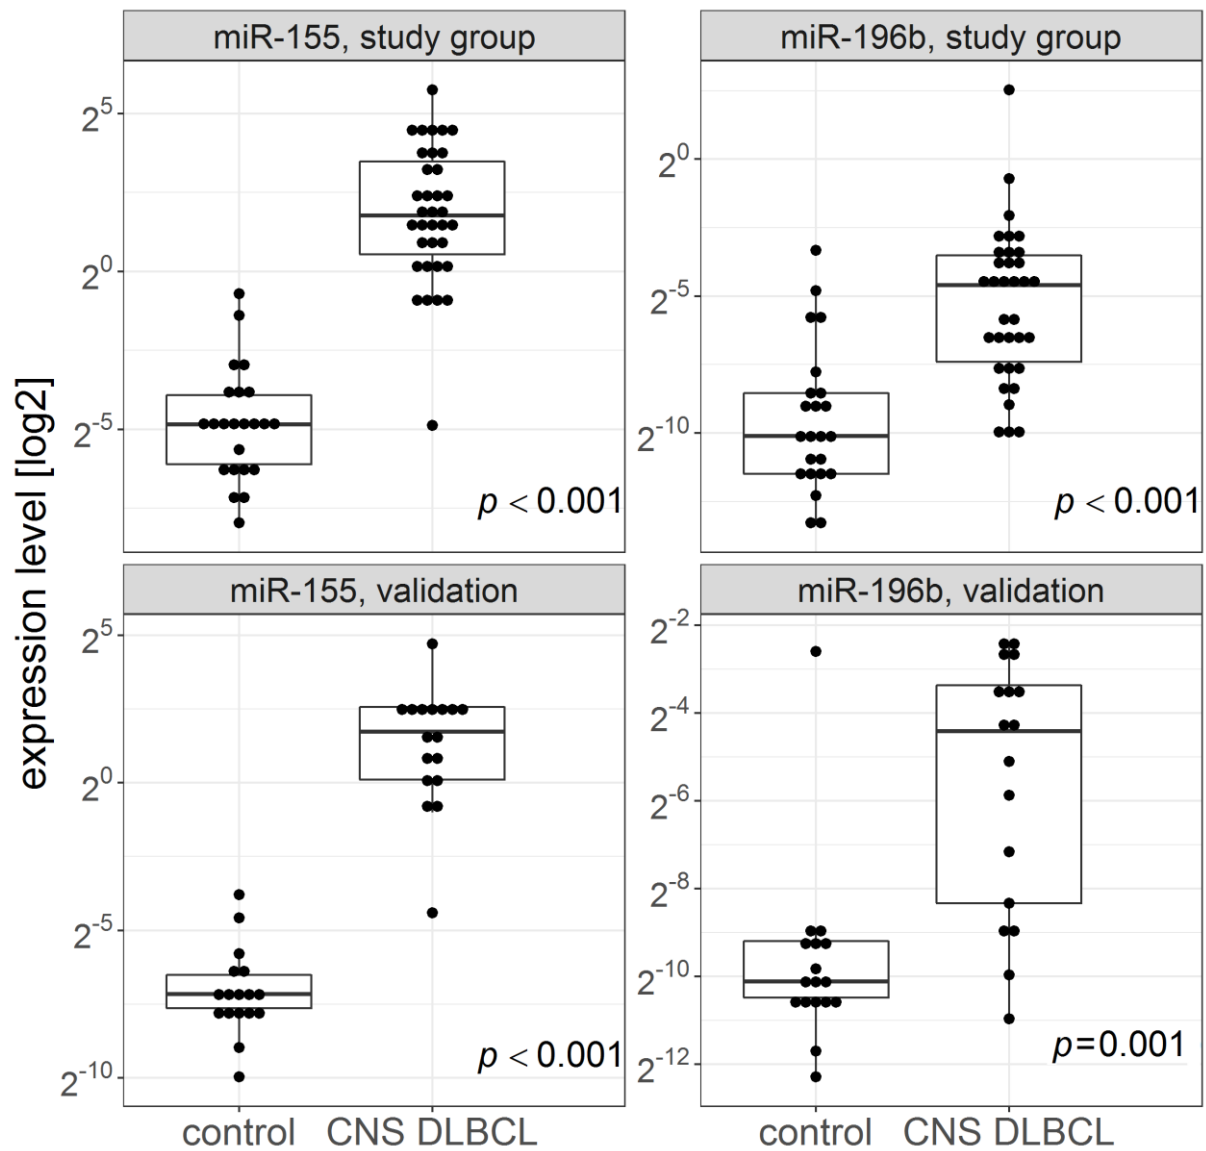

**Figure S1.** MicroRNA expression in formalin-fixed paraffin-embedded brain tumor biopsy samples of patients with CNS DLBCL and with non-malignant CNS diseases (Controls). Top row, study groups, n=58, including CNS DLBCL, n=35 and controls, n=23. Median expression values in control groups and CNS DLBCLs: for miR-155 0.035 and 3.395, for miR-196b, 0.0009 and 0.04 respectively. Bottom row, validation sets, n=34, including CNS DLBCL, n=17, and controls, n=17. Median expression values in control groups and CNS DLBCLs: for miR-155 0.007 and 3.31, respectively for miR-196b, 0.0009 and 0.047, respectively.
