# Supplementary material for: Tumor and Cerebrospinal Fluid microRNAs in Primary Central Nervous System Lymphomas
Source: MDPI journal article supplement (doi:10.3390/cancers11111647), 2019-10-25
Supplement: s1 [file s1]

*Immunohistochemical staining of FFPE samples*

A reaction for CD20, BCL6, MUM1 and CD5 was considered positive if at least 20% of the CNS DLBCL cells showed staining, while for CD10 – if any cell showed staining. Cases with a 100% IHC positivity of tumor cells were evaluated as positive (+). Patterns of BCL2 staining were divided into 3 categories: (–) “negative”, the lack of BCL2 expression on CNS DLBCL cells, (+) “positive”, the expression of BCL2 on CNS DLBCL cells, comparable or lower than in the surrounding small lymphocytes, and (++)h, strong BCL2 staining on CNS DLBCL cells, higher than in the background cells. A reaction was considered positive, if at least 20% of the CNS DLBCL cells showed BCL2 signal.

*Flow cytometry immunophenotyping of CSF samples*

The expression of B-cell antigens CD(45/19/20/10) with kappa/lambda light chain, T-cell antigens CD(45/3/4/8/5/43) and macrophage antigens (CD14, HLADR) was quantified on FACSCalibur and FACSCanto II cytometers (Becton Dickinson, BD) and samples were categorized into three groups, according to the percentages of positive cells: (–), no expression (<20% of neoplastic cells); (+/–), expression in  $\geq 20\%$ <100% of cells; (+), expression in 100% of cells.

*Immunohistochemical subgroups of CNS DLBCL*

In 52 CD20(+) CNS DLBCL cases, 15% (8/52) expressed CD10, 94% (49/52) – BCL6, 100% (52/52) – MUM1, 26% (12/47) – CD5 and 98% (51/52) – BCL2. BCL2 was overexpressed (BCL2<sup>higher</sup>) in 37% of cases. CNS DLBCLs have been classified as non-GCB (35 cases, 67%), GCB (5 cases, 10%) and CD5 positive (12 cases, 23%).
