# Supplementary material for: Tumor and Cerebrospinal Fluid microRNAs in Primary Central Nervous System Lymphomas
Source: MDPI journal article supplement (doi:10.3390/cancers11111647), 2019-10-25
Supplement: s1 [file s1]

**Table S6.** The clones of Dako antibodies used for immunohistochemistry analyses.

| <b>MoAb</b> | <b>CD3</b> | <b>CD5</b> | <b>CD10</b> | <b>CD20</b> | <b>BCL2</b> | <b>BCL6</b> | <b>MUM1</b> | <b>Ki-67</b> |
|-------------|------------|------------|-------------|-------------|-------------|-------------|-------------|--------------|
| Clone       | F7.2.38    | SP19       | 56C6        | L26         | 124         | PG-B6p      | MUM1p       | MIB-1        |
| Dilution    | 1:50       | F          | F           | F           | F           | F           | F           | F            |

MoAb, monoclonal antibody; Dako, (Glostrup, Denmark); F - FLEX, EnVision FLEX. High-sensitivity visualization system, intended for use in immunohistochemistry together with Dako Omnis autostainer was used.
