# Supplementary material for: Tumor and Cerebrospinal Fluid microRNAs in Primary Central Nervous System Lymphomas
Source: MDPI journal article supplement (doi:10.3390/cancers11111647), 2019-10-25
Supplement: s1 [file s1]

**Table S5.** Patients with CNS DLBCL (n=30), clinical diagnosis and miRNA expression level in the cerebrospinal fluid (CSF).

| no. | age/<br>sex | Histopathology | FCM<br>diagnosis:<br>positive for<br>lymphoma<br>(1),<br>negative for<br>lymphoma<br>(2) | Cytology   | miRNA from CSF |            |             |       |        |             |              |              |
|-----|-------------|----------------|------------------------------------------------------------------------------------------|------------|----------------|------------|-------------|-------|--------|-------------|--------------|--------------|
|     |             |                |                                                                                          |            | miR-<br>19b    | miR-<br>21 | miR-<br>92a | miR-9 | miR-9* | miR-<br>155 | miR-<br>125b | miR-<br>196b |
| 19  | 50/m        | CNS DLBCL      | 2                                                                                        | L, M, E, D | 5.897          | 8.388      | 11.162      | 0.10  | 0.58   |             |              |              |
| 118 | 64/m        | CNS DLBCL      | 1 (minimal<br>involvement)                                                               | L, M, E    | 1.744          | 26.308     | 2.249       | 2.19  | 1.08   |             |              |              |
| 119 | 69/m        | CNS DLBCL      | 2                                                                                        | L, M, E    | 3.929          | 18.105     | 3.524       |       |        | 0.08        |              |              |
| 24  | 62/f        | CNS DLBCL      | 2                                                                                        | L, M, E    | 0.966          | 3.546      | 1.345       |       |        |             |              |              |
| 29  | 67/m        | CNS DLBCL      | 2                                                                                        | L*         | 9.448          | 93.073     | 23.730      |       |        | 0.25        |              |              |
| 28  | 51/f        | CNS DLBCL      | 2                                                                                        | L          | 2.236          | 11.390     | 4.570       | 0.37  | 0.33   |             |              |              |
| 44  | 49/f        | CNS DLBCL      | 1 (minimal<br>involvement)                                                               | L*         | 7.463          | 38.362     | 19.483      | 0.07  | 0.19   |             |              |              |
| 120 | 20/m        | CNS DLBCL      | 2                                                                                        | L, D       | 1.012          | 17.655     | 2.862       | 0.04  |        |             |              |              |
| 30  | 61/m        | CNS DLBCL      | 2                                                                                        | L, D       | 91.136         | 520.987    | 78.325      |       |        | 0.01        |              |              |
| 31  | 59/f        | CNS DLBCL      | 2                                                                                        | L, M       | 0.652          | 67.028     | 6.724       | 0.63  |        |             |              |              |
| 121 | 73/f        | CNS DLBCL      | 1 (minimal<br>involvement)                                                               | L, M*      | 6.323          | 33.581     | 8.412       | 0.02  | 1.46   | 0.30        |              |              |
| 33  | 65/f        | CNS DLBCL      | 1 (minimal<br>involvement)                                                               | L, M       | 1.443          | 24.959     | 2.131       | 0.00  | 0.18   |             |              |              |
| 122 | 28/m        | CNS DLBCL      | 1 (minimal<br>involvement)                                                               | L*         | 1.040          | 48.824     | 1.636       |       |        |             |              |              |
| 38  | 42/m        | CNS DLBCL      | 2                                                                                        | L* M       | 6.471          | 3.564      | 5.931       |       |        |             | 2.93         | 0.13         |
| 123 | 60/f        | CNS DLBCL      | 2                                                                                        | L, M, E    | 1.392          | 7.985      | 3.532       |       |        |             | 6.40         | 0.12         |
| 124 | 50/m        | CNS DLBCL      | 2                                                                                        | L, M, E    | 1.236          | 9.913      | 1.973       |       |        |             | 5.09         | 0.00         |

|     |      |           |                         |            |        |        |        |      |      |      |       |      |
|-----|------|-----------|-------------------------|------------|--------|--------|--------|------|------|------|-------|------|
| 125 | 56/f | CNS DLBCL | 2                       | L, M, E    | 14.023 | 14.036 | 14.016 | 0.07 | 0.48 |      | 3.99  | 0.03 |
| 37  | 63/f | CNS DLBCL | 2                       | L, M       | 7.918  | 20.676 | 11.603 |      |      | 3.89 | 1.85  | 0.00 |
| 126 | 68/f | CNS DLBCL | 2                       | L* M       | 1.773  | 11.068 | 2.093  |      | 0.23 | 0.24 | 0.81  | 0.05 |
| 9   | 67/f | CNS DLBCL | 2                       | L, M, D    | 0.879  | 7.354  | 1.891  |      |      |      | 5.60  | 0.00 |
| 1   | 45/f | CNS DLBCL | 2                       | L, M       | 1.872  | 3.084  | 2.779  |      |      | 0.00 | 13.99 | 0.01 |
| 10  | 36/m | CNS DLBCL | 2                       | L, M, E, D | 9.046  | 11.838 | 14.698 | 0.00 |      | 0.02 |       |      |
| 127 | 51/m | CNS DLBCL | 2                       | L, M, E, D | 1.086  | 2.918  | 1.315  |      |      |      |       |      |
| 128 | 59/f | CNS DLBCL | 1 (minimal involvement) | L, M, D    | 1.678  | 13.419 | 1.242  | 0.00 |      | 0.03 |       |      |
| 129 | 64/m | CNS DLBCL | 1 (massive involvement) | L, M, E    | 2.639  | 80.651 | 2.184  | 0.01 |      | 0.02 |       |      |
| 7   | 52/m | CNS DLBCL | 2                       | L, M       | 0.493  | 7.228  | 1.460  |      |      |      |       |      |
| 130 | 52/m | CNS DLBCL | 2                       | L, M       | 1.158  | 11.509 | 2.656  |      |      |      |       |      |
| 5   | 59/m | CNS DLBCL | 2                       | L, M       | 1.318  | 7.983  | 2.043  |      |      |      |       |      |
| 131 | 79/f | CNS DLBCL | 2                       | L, M, E    | 3.906  | 93.414 | 22.877 |      |      |      |       |      |
| 8   | 63/f | CNS DLBCL | 1 (minimal involvement) | L, M       | 1.305  | 9.893  | 2.362  |      |      |      |       |      |

patients number 118-131 with CNS DLBCL with no simultaneous analysis of miRNA in FFPET (formalin fixed paraffin embedded tissue), patients no. 1, 5, 7-10, 19, 24, 28-31, 33, 37-38 with simultaneously analyzed miRNA in FFPET and CSF, age/sex., m-male, f-female; Histopathology, primary histopathological diagnosis based on CNS tumor; Cytological smears: L – lymphocytes, M – macrophages, D – debris, E – erythrocytes; miRNA from CSF, miRNA level expression (miR-19b, miR-21, miR-92a, miR-9, miR-9\*, miR-155, miR-125b, miR-196b) from CSF.
