# Supplementary material for: Tumor and Cerebrospinal Fluid microRNAs in Primary Central Nervous System Lymphomas
Source: MDPI journal article supplement (doi:10.3390/cancers11111647), 2019-10-25
Supplement: s1 [file s1]

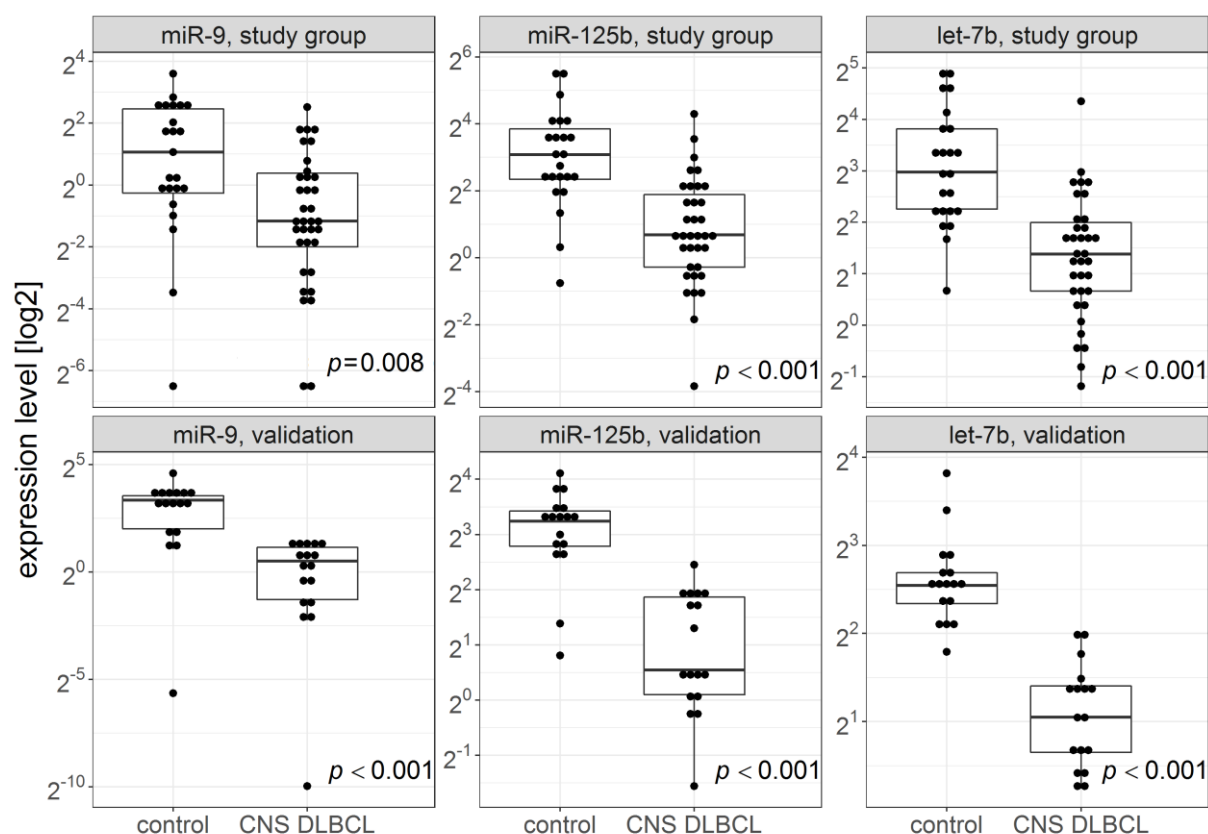

**Figure S2.** MicroRNA expression in formalin-fixed paraffin-embedded brain tumor biopsy samples of patients with CNS DLBCL and with non-malignant CNS diseases (control). Top row, study groups: CNS DLBCL, n=35 and controls, n=23; median expression values in control groups and CNS DLBCLs for miR-9, 2.097 and 0.446, respectively, for miR-125b, 8.47 and 1.61 for miR-let-7b, 7.873 and 2.61, respectively. Bottom row, validation group, CNS DLBCL, n=17, controls, n=17; median expression values in control group and CNS DLBCLs for miR-9, 10.08 and 1.42, respectively, for miR-125b, 9.47 and 1.46, respectively and for miR-let-7b, 5.84 and 2.07, respectively.
