# Supplementary material for: Tumor and Cerebrospinal Fluid microRNAs in Primary Central Nervous System Lymphomas
Source: MDPI journal article supplement (doi:10.3390/cancers11111647), 2019-10-25
Supplement: s1 [file s1]

**Table S1.** Validation of the discrimination power of miR-155 and miR-let-7b expression measurements between CNS DLBCL and non-malignant tumors. Following the study group analysis (**a**, n=58), an independent series of biopsies of CNS DLBCL and non-malignant tumors was examined (validation group, **b**, n=34).

To predict diagnosis on the basis of miR-let-7b and miR-155 levels, a logistic regression model was built:  $\alpha = -2.664 - 0.1225[\text{miR-let-7b}] + 9.32[\text{miR-155}]$ . Samples with a prediction index of  $>0$  were predicted malignant. The incorrectly qualified sample is marked in yellow.

(a)

| patient ID no.* | true malignant (1) vs. non-malignant (0) | miR-let-7b | miR-155 | prediction index |
|-----------------|------------------------------------------|------------|---------|------------------|
| 14              | 1                                        | 1.98       | 53.291  | 493.7694         |
| 16              | 1                                        | 3.57       | 25.7    | 236.4242         |
| 38              | 1                                        | 1.57       | 23.72   | 218.2155         |
| 15              | 1                                        | 3.2        | 22.246  | 204.278          |
| 11              | 1                                        | 6.52       | 19.136  | 174.8858         |
| 39              | 1                                        | 7.88       | 18.993  | 173.3863         |
| 9               | 1                                        | 4.17       | 15.103  | 137.5858         |
| 36              | 1                                        | 2.61       | 12.79   | 116.2196         |
| 19              | 1                                        | 0.89       | 11.874  | 107.8932         |
| 10              | 1                                        | 2.3        | 10.406  | 94.03853         |
| 44              | 1                                        | 3.09       | 8.365   | 74.91944         |
| 37              | 1                                        | 2.53       | 5.938   | 52.36822         |
| 4               | 1                                        | 2.63       | 5.38    | 47.15537         |
| 21              | 1                                        | 3.83       | 5.224   | 45.5544          |
| 43              | 1                                        | 0.75       | 4.661   | 40.68459         |
| 18              | 1                                        | 1.22       | 3.997   | 34.43846         |
| 2               | 1                                        | 0.72       | 3.48    | 29.68125         |
| 22              | 1                                        | 3.19       | 3.395   | 28.58639         |
| 17              | 1                                        | 0.57       | 3.11    | 26.2512          |
| 8               | 1                                        | 1.4        | 3.007   | 25.18953         |
| 20              | 1                                        | 1.59       | 2.619   | 21.55005         |
| 40              | 1                                        | 2.22       | 2.512   | 20.47561         |
| 35              | 1                                        | 1.92       | 2.43    | 19.74812         |
| 3               | 1                                        | 5.54       | 2.05    | 15.76293         |
| 12              | 1                                        | 0.44       | 1.943   | 15.39059         |
| 1               | 1                                        | 1.94       | 1.71    | 13.03522         |
| 6               | 1                                        | 1.05       | 1.243   | 8.79179          |
| 24              | 1                                        | 7.05       | 1.168   | 7.3576           |
| 5               | 1                                        | 4.18       | 1.077   | 6.861136         |
| 7               | 1                                        | 3.13       | 1.007   | 6.337387         |
| 13              | 1                                        | 1.59       | 0.51    | 1.894004         |
| 42              | 1                                        | 3.37       | 0.529   | 1.852981         |
| 23              | 1                                        | 6.23       | 0.534   | 1.549144         |
| 73              | 0                                        | 3.874      | 0.382   | 0.421174         |
| 41              | 1                                        | 20.45      | 0.555   | 0.002481         |
| 75              | 0                                        | 27.868     | 0.615   | -0.34725         |
| 64              | 0                                        | 1.588      | 0.132   | -1.62874         |
| 71              | 0                                        | 3.724      | 0.125   | -1.95571         |
| 63              | 0                                        | 4.459      | 0.064   | -2.61429         |
| 69              | 0                                        | 5.621      | 0.078   | -2.62619         |
| 70              | 0                                        | 3.185      | 0.041   | -2.67255         |
| 57              | 0                                        | 4.84       | 0.035   | -2.93126         |
| 62              | 0                                        | 6.248      | 0.038   | -3.07582         |
| 55              | 0                                        | 4.84       | 0.011   | -3.15494         |

|    |   |        |       |          |
|----|---|--------|-------|----------|
| 53 | 0 | 4.72   | 0.007 | -3.17752 |
| 25 | 1 | 7.19   | 0.034 | -3.22853 |
| 68 | 0 | 7.873  | 0.03  | -3.34949 |
| 65 | 0 | 7.476  | 0.014 | -3.44997 |
| 72 | 0 | 9.959  | 0.039 | -3.52121 |
| 61 | 0 | 10.61  | 0.039 | -3.60098 |
| 54 | 0 | 13.7   | 0.068 | -3.70932 |
| 59 | 0 | 10.299 | 0.02  | -3.73995 |
| 60 | 0 | 9.778  | 0.004 | -3.82524 |
| 66 | 0 | 14.495 | 0.035 | -4.11429 |
| 56 | 0 | 17.55  | 0.032 | -4.51658 |
| 67 | 0 | 23.862 | 0.011 | -5.48572 |
| 58 | 0 | 24.82  | 0.007 | -5.64038 |
| 74 | 0 | 31.43  | 0.015 | -6.37575 |

\*patients' ID numbers as in Table S3 and S4

(b)

| patient ID no. | miR-let-7b<br>expression | miR-155<br>expression | prediction<br>index | predicted as<br>malignant (1) | true<br>malignant (1) |
|----------------|--------------------------|-----------------------|---------------------|-------------------------------|-----------------------|
| 31             | 2.07                     | 26.04                 | 239.7769            | 1                             | 1                     |
| 34             | 1.57                     | 6.49                  | 57.63054            | 1                             | 1                     |
| 50             | 2.53                     | 6.42                  | 56.8605             | 1                             | 1                     |
| 51             | 2.65                     | 6.12                  | 54.04978            | 1                             | 1                     |
| 49             | 3.99                     | 5.92                  | 52.02157            | 1                             | 1                     |
| 32             | 2.57                     | 5.43                  | 47.62872            | 1                             | 1                     |
| 46             | 3.93                     | 5.13                  | 44.66606            | 1                             | 1                     |
| 28             | 3.4                      | 4.8                   | 41.65537            | 1                             | 1                     |
| 48             | 1.38                     | 3.31                  | 28.01596            | 1                             | 1                     |
| 47             | 1.18                     | 2.54                  | 20.86401            | 1                             | 1                     |
| 27             | 1.59                     | 1.8                   | 13.91691            | 1                             | 1                     |
| 52             | 2.06                     | 1.76                  | 13.48652            | 1                             | 1                     |
| 33             | 1.23                     | 1.08                  | 7.250561            | 1                             | 1                     |
| 26             | 1.29                     | 1.01                  | 6.590804            | 1                             | 1                     |
| 30             | 2.8                      | 0.66                  | 3.143754            | 1                             | 1                     |
| 29             | 2.53                     | 0.5                   | 1.685625            | 1                             | 1                     |
| 79             | 3.46                     | 0.072                 | -2.41732            | 0                             | 0                     |
| 45             | 1.62                     | 0.0472                | -2.42301            | 0                             | 1                     |
| 87             | 6.46                     | 0.042                 | -3.06452            | 0                             | 0                     |
| 77             | 4.23                     | 0.008                 | -3.10816            | 0                             | 0                     |
| 91             | 4.34                     | 0.005                 | -3.1496             | 0                             | 0                     |
| 92             | 4.37                     | 0.005                 | -3.15327            | 0                             | 0                     |
| 78             | 5.06                     | 0.008                 | -3.20986            | 0                             | 0                     |
| 80             | 5.88                     | 0.018                 | -3.21713            | 0                             | 0                     |
| 90             | 5.71                     | 0.011                 | -3.26154            | 0                             | 0                     |
| 81             | 6.12                     | 0.013                 | -3.29314            | 0                             | 0                     |
| 88             | 5.81                     | 0.008                 | -3.30176            | 0                             | 0                     |
| 94             | 5.28                     | 0.001                 | -3.30205            | 0                             | 0                     |
| 76             | 5.84                     | 0.007                 | -3.31475            | 0                             | 0                     |
| 93             | 6.45                     | 0.006                 | -3.39882            | 0                             | 0                     |
| 89             | 7.3                      | 0.005                 | -3.51229            | 0                             | 0                     |
| 82             | 7.55                     | 0.004                 | -3.55224            | 0                             | 0                     |
| 86             | 10.53                    | 0.002                 | -3.93602            | 0                             | 0                     |
| 85             | 14.09                    | 0.004                 | -4.35359            | 0                             | 0                     |

\*patients' ID numbers as in Table S3 and S4
