# Supplementary material for: Tumor and Cerebrospinal Fluid microRNAs in Primary Central Nervous System Lymphomas
Source: MDPI journal article supplement (doi:10.3390/cancers11111647), 2019-10-25
Supplement: s1 [file s1]

**Table S2.** Patients with non-neoplastic cerebral tumors (n=23): clinical diagnosis and miRNA expression level in the cerebrospinal fluid (CSF).

| pt. ID no. | age/sex | miRNA from CSF |        |         | Baraniskin's diagnostic algorithm <sup>1</sup> : positive for lymphoma (1), negative for lymphoma (2) | FCM diagnosis positive for lymphoma (1), negative for lymphoma (2) | Cytology    | ICD-10             |
|------------|---------|----------------|--------|---------|-------------------------------------------------------------------------------------------------------|--------------------------------------------------------------------|-------------|--------------------|
|            |         | miR-19b-1      | miR-21 | miR-92a |                                                                                                       |                                                                    |             |                    |
| 95         | 36/m    | 0.612          | 9.792  | 1.29    | 2                                                                                                     | 2                                                                  | L           | G37.9              |
| 96         | 49/f    | 0.565          | 4.641  | 0.52    | 2                                                                                                     | 2                                                                  | L, M, E     | D33.1              |
| 97         | 54/f    | 2.481          | 75.747 | 2.80    | 1                                                                                                     | 2                                                                  | L, M, E, Eo | G04.9 (viral)      |
| 98         | 38/m    | 0.484          | 1.191  | 0.38    | 2                                                                                                     | 2                                                                  | L, M, E     | I67.7              |
| 99         | 17/m    | 1.131          | 14.654 | 2.31    | 2                                                                                                     | 2                                                                  | D           | G04.8 (HD)         |
| 100        | 61/f    | 0.381          | 3.966  | 0.66    | 2                                                                                                     | 2                                                                  | L, M        | I67.7              |
| 101        | 48/m    | 1.083          | 36.305 | 2.92    | 2                                                                                                     | 2                                                                  | L, M*       | G04.9 (ADEM)       |
| 102        | 30/f    | 1.316          | 9.913  | 2.09    | 2                                                                                                     | 2                                                                  | L, M, Neu*  | G35 (SM)           |
| 103        | 48 /f   | 1.988          | 11.406 | 2.25    | 1                                                                                                     | 2                                                                  | L, M*       | G37.9              |
| 104        | 59/m    | 1.474          | 5.381  | 1.63    | 2                                                                                                     | 2                                                                  | L*          | G04.8              |
| 105        | 81/f    | 1.359          | 6.173  | 2.51    | 2                                                                                                     | 2                                                                  | L, M        | D43.1 (meningioma) |
| 106        | 31/f    | 1.276          | 4.960  | 1.35    | 2                                                                                                     | 2                                                                  | L, M        | D33                |
| 107        | 9/f     | 31.89          | 0.500  | 1.62    | 2                                                                                                     | 2                                                                  | L, M        | G40.2              |
| 108        | 13/f    | 30.08          | 1.835  | 2.08    | 2                                                                                                     | 2                                                                  | L, E, D     | I87.3              |
| 109        | 40/m    | 29.94          | 1.800  | 2.51    | 2                                                                                                     | 2                                                                  | L, M        | G37.9              |
| 110        | 26/m    | 1.526          | 13.289 | 1.88    | 1                                                                                                     | 2                                                                  | L, M        | D33.1              |
| 111        | 14/m    | 0.749          | 16.43  | 1.39    | 2                                                                                                     | 2                                                                  | L, M        | G35 (SM)           |
| 112        | 16/f    | 0.904          | 7.435  | 1.47    | 2                                                                                                     | 2                                                                  | L, M        | G35 (SM)           |
| 113        | 12/m    | 0.924          | 11.35  | 2.31    | 2                                                                                                     | 2                                                                  | L, M        | G35 (SM)           |
| 114        | 17/f    | 0.663          | 12.07  | 0.98    | 2                                                                                                     | 2                                                                  | L, M*       | G36 [Devic]        |
| 115        | 14/m    | 1.148          | 3.515  | 1.27    | 2                                                                                                     | 2                                                                  | L, M        | G35 (SM)?          |
| 116        | 16/f    | 3.696          | 1.933  | 3.26    | 2                                                                                                     | 2                                                                  | E, D        | G35 (SM)           |
| 117        | 70/f    | 3.431          | 65.979 | 45.64   | 1                                                                                                     | 2                                                                  | L, D*       | G04.9 (no viral)   |

<sup>1</sup>Baraniskin, A.; Kuhnhen, J.; Schlegel, U.; Chan, A.; Deckert, M.; Gold, R.; Maghnouj, A.; Zollner, H.; Reinacher-Schick, A.; Schmieg, W.; Hahn, S. A.; Schroers, R., Identification of microRNAs in the cerebrospinal fluid as marker for primary diffuse large B-cell lymphoma of the central nervous system. Blood 2011, 117, (11), 3140-6.

age/sex, m-male, f-female; miRNA level expression (miR-19b-1, miR-21, miR-92a) from CSF; Baraniskin's algorithm positive for lymphoma (19b-1  $\geq 1.4$  and miR-21  $\geq 8$  or miR-92a  $\geq 2.5$ ) (1), negative for lymphoma diagnosis (lower value of the above-mentioned miRNAs) (2); cytological smears: L – lymphocytes, M – macrophages, D – debris, E – erythrocytes, Eo – eosinophils, Neu – neutrophils), \*Cerebrospinal fluid pleocytosis level (Lymphocytic pleocytosis?); Clinical diagnosis of non-neoplastic CNS tumors according to the International Classification of Diseases, Tenth Revision, Clinical Modification (ICD-10-CM).

Diseases of the nervous system codes:

C71 Malignant neoplasm of cerebrum, except lobes and ventricles,

C71.9 Malignant neoplasm of brain, unspecified,

D33 Benign neoplasm of brain and other parts of central nervous system,  
D33.1 Benign neoplasm of brain, infratentorial,  
D33.2 Benign neoplasm of brain, unspecified,  
D43.1 Neoplasm of uncertain behavior of brain, infratentorial,  
G04.8 Other encephalitis, myelitis and encephalomyelitis,  
- HD, Huntington's disease.  
G04.9 Encephalitis, myelitis and encephalomyelitis, unspecified,  
- ADEM, Acute Disseminated Encephalomyelitis.  
G35 Multiple sclerosis (SM),  
G36 Neuromyelitis optica [Devic],  
G37.9 Demyelinating disease of central nervous system, unspecified,  
G40.2 Localization-related (focal) (partial) symptomatic epilepsy and epileptic syndromes with complex partial seizures,  
I67.7 Central nervous system vasculitis (cerebral NEC),  
I87.3 Cerebral venous thrombosis CVT in the puerperium.
